# Supplementary material
Source: Elsevier journal article supplement (https://www.sciencedirect.com/science/article/pii/S0122726220300501)
Supplement: mmc1 [file S0122726220300501:mmc1.docx]

**Anexo 1:**

**Cuestionario de percepción de transferencia del aprendizaje de la simulación a la práctica clínica**

| **Pautas para diligenciar la encuesta**  Este cuestionario se compone de dos partes, la primera contiene datos como su edad, género y la cantidad de semestres que ha cursado haciendo uso de simulación clínica de alta fidelidad como metodología de enseñanza - aprendizaje y desarrollo de habilidades. La segunda parte incluye una serie de planteamientos que pretenden encontrar su grado de acuerdo o desacuerdo con ellos, según usted se sienta identificado. Cada planteamiento tiene una sola opción de respuesta entre 5 posibles haciendo clic sobre el circulo así:    1= Totalmente en desacuerdo.  2 = En desacuerdo.  3 = Ni en desacuerdo ni de acuerdo.  4 = De acuerdo.  5 =Totalmente de acuerdo.  Le agradecemos la mayor sinceridad posible ya que es la única manera de acercarnos a la realidad. | | |
| --- | --- | --- |
|  | **Enunciado** | **Respuesta** |
| 1 | Las personas del hospital han notado mi buen nivel comparado a los compañeros que no han tenido simulación de alta fidelidad. | 1 2 3 4 5 |
| 2 | La simulación clínica de alta fidelidad me permitió entrenar en espacios que se asemejan a los escenarios en los que he rotado en la clínica / hospital. | 1 2 3 4 5 |
| 3 | Usar equipos electrónicos para la atención de pacientes en simulación no me ha ayudado a manejar mejor los equipos en la vida real. | 1 2 3 4 5 |
| 4 | Los casos clínicos planteados en la simulación clínica de alta fidelidad me han ayudado a integrar la teoría y la práctica. | 1 2 3 4 5 |
| 5 | Creo que la simulación clínica me ha alejado de los principios de humanidad en la práctica, pues el paciente es un maniquí. | 1 2 3 4 5 |
| 6 | Pienso que la simulación clínica de alta fidelidad no es experiencia real, por tanto, en la práctica no he podido tener el mismo nivel de rendimiento. | 1 2 3 4 5 |
| 7 | El debriefing realizado después de la simulación me ha permitido una mayor comprensión de mis conocimientos, corrección de los errores cometidos durante el caso y mejoría de mi desempeño clínico real. | 1 2 3 4 5 |
| 8 | El trabajo en equipo que realicé en simulación no he podido llevarlo a cabo en la vida real. | 1 2 3 4 5 |
| 9 | La simulación clínica me ha permitido integrar lo practicado con la aplicabilidad de protocolos y uso de ayudas diagnósticas en el hospital. | 1 2 3 4 5 |
| 10 | La simulación clínica de alta fidelidad me dio herramientas para trabajar en equipo en la práctica real. | 1 2 3 4 5 |
| 11 | Durante mi práctica clínica real he podido utilizar las técnicas para una RCCP aprendidas en la simulación clínica. | 1 2 3 4 5 |
| 12 | El liderazgo practicado en simulación no he podido llevarlo a la práctica clínica. | 1 2 3 4 5 |
| 13 | La simulación clínica me ha permitido practicar el manejo de patologías frecuentes, lo que me ha facilitado el diagnóstico y manejo de estas. | 1 2 3 4 5 |
| 14 | Las enseñanzas que se dan en las prácticas con simulación de alta fidelidad no me han ayudado a brindar un trato más amable a mis pacientes o a sus familias. | 1 2 3 4 5 |
| 15 | La simulación clínica de alta fidelidad me ha permitido una mayor competencia en la exploración semiológica del enfermo crítico, lo que me ha facilitado la exploración de pacientes reales. | 1 2 3 4 5 |
| 16 | Los vídeos de retroalimentación usados después de la simulación de alta fidelidad no ayudan en la mejoría de mi desempeño clínico. | 1 2 3 4 5 |
| 17 | Durante la práctica real, he identificado alteraciones electrocardiográficas, gracias a que lo practiqué en la simulación clínica. | 1 2 3 4 5 |
| 18 | Las prácticas de paciente seguro mediante la simulación clínica no me han ayudado a mantener la seguridad de los enfermos reales. | 1 2 3 4 5 |
| 19 | El manejo adecuado de la vía aérea lo aprendí en simulación clínica, lo que me ha permitido hacerlo mejor en la práctica clínica. | 1 2 3 4 5 |
| 20 | Durante la simulación clínica practiqué como comunicar una situación clínica, pero en la vida real no he podido hacer lo mismo. | 1 2 3 4 5 |
| 21 | El stress que percibía en la simulación durante una parada cardíaca me sirvió para aprender a modularlo y estar tranquilo durante una RCCP | 1 2 3 4 5 |
| 22 | Practicar RCCP con simuladores no me ha ayudado a manejar mi estrés en las paradas cardíacas reales. | 1 2 3 4 5 |
| 23 | En la práctica real se me ha facilitado comunicarme con el equipo utilizando el lenguaje clínico trabajado en la simulación clínica. | 1 2 3 4 5 |
| 24 | Cuando he tenido que apoyar en el manejo de la vía aérea, lo aprendido en simulación no lo puedo hacer en el paciente real. | 1 2 3 4 5 |
| 25 | Creo que la simulación clínica de alta fidelidad me ha brindado experiencia sin poner en riesgo al paciente. | 1 2 3 4 5 |
| 26 | Pienso que puedo monitorizar al simulador, pero se me dificulta hacerlo adecuadamente en el paciente real. | 1 2 3 4 5 |
| 27 | Ver mi desempeño en la simulación clínica me ha permitido mejorar mi desempeño y a no cometer los mismos errores en la vida real. | 1 2 3 4 5 |
| 28 | La exploración semiológica que aprendí en simulación dista mucho de la exploración en un paciente real, más aún en situaciones de emergencia. | 1 2 3 4 5 |
| 29 | La simulación clínica de alta fidelidad me ha enseñado a dar un trato empático a los pacientes reales. | 1 2 3 4 5 |
| 30 | Practicar en escenarios de alta fidelidad me ha ayudado a mejorar mi liderazgo durante mis prácticas reales. | 1 2 3 4 5 |
| 31 | Cuando me he enfrentado a una RCCP no he sido capaz de usar los conocimientos y destrezas adquiridas en simulación clínica. | 1 2 3 4 5 |
| 32 | Los espacios hospitalarios me son familiares gracias a que practiqué en escenarios similares durante mi aprendizaje con simulación. | 1 2 3 4 5 |
| 33 | En simulación clínica practiqué como resolver casos, analizar ayudas y protocolos, en la vida real no he podido hacer lo mismo. | 1 2 3 4 5 |
| 34 | En simulación clínica he tenido que trabajar en equipo, lo que me ha permitido desenvolverme mejor en nuevos equipos en la vida real. | 1 2 3 4 5 |
| 35 | El debriefing no me ha ayudado a aprender, en la vida real cometo los mismos errores que cometía antes de entrenar con los simuladores. | 1 2 3 4 5 |
| 36 | Creo que la experiencia adquirida durante las simulaciones me ha permitido tener un mejor rendimiento en la práctica clínica. | 1 2 3 4 5 |
| 37 | Practicar en simulación no me ha ayudado a controlar mi reacción en emergencias reales. | 1 2 3 4 5 |
| 38 | Pienso que el entrenar en simulación me ha permitido llevar los conceptos de humanización a mi práctica clínica. | 1 2 3 4 5 |
| 39 | Los casos que se realizan en simulación no permiten integrar lo teórico con lo práctico. | 1 2 3 4 5 |
| 40 | Los escenarios en los que practiqué en simulación de alta fidelidad no son similares a los de la práctica clínica. | 1 2 3 4 5 |
| 41 | He notado diferencia a mi favor entre mi rendimiento en la clínica frente a mis pares que no han tenido educación basada en simulación. | 1 2 3 4 5 |
| 42 | La simulación clínica no me ha permitido desarrollar habilidades no técnicas. | 1 2 3 4 5 |
